# Supplementary material for: Prognostic Value of C-Reactive Protein-to-Albumin Ratio in Head and Neck Cancer: A Meta-Analysis
Source: MDPI journal article supplement (doi:10.3390/diagnostics11030403), 2021-02-26
Supplement: s1 [file s1]

# Prognostic Value of C-Reactive Protein-to-Albumin Ratio in Head and Neck Cancer: A Meta-Analysis

Chih-Wei Luan, Hsin-Yi Yang, Yao-Te Tsai, Meng-Chiao Hsieh, Hsin-Hsu Chou and Kuo-Su Chen

Table S1. The Newcastle–Ottawa Scale score of included studies.

| Study             | Selection                        |                                         |                          |                           | Comparability  |                      | Outcome                      |                                          | Non Response Rate | Score |
|-------------------|----------------------------------|-----------------------------------------|--------------------------|---------------------------|----------------|----------------------|------------------------------|------------------------------------------|-------------------|-------|
|                   | Is the Case Definition Adequate? | Representa-<br>tiveness of<br>the Cases | Selection<br>of Controls | Definition<br>of Controls | Main<br>Factor | Additional<br>Factor | Ascertainment<br>of Exposure | Same Method<br>for Cases and<br>Controls |                   |       |
| Li et al. [1]     | v                                | v                                       | v                        | x                         | v              | x                    | v                            | v                                        | v                 | 7     |
| He et al. [2]     | v                                | v                                       | v                        | x                         | v              | x                    | v                            | v                                        | v                 | 7     |
| Zhang et al. [3]  | v                                | v                                       | v                        | x                         | v              | v                    | v                            | v                                        | v                 | 8     |
| Wang et al. [4]   | v                                | v                                       | v                        | x                         | v              | v                    | v                            | v                                        | v                 | 8     |
| Tao et al. [5]    | v                                | v                                       | v                        | x                         | v              | x                    | v                            | v                                        | v                 | 7     |
| Sun et al. [6]    | v                                | v                                       | v                        | x                         | v              | v                    | v                            | v                                        | v                 | 8     |
| Kuboki et al. [7] | v                                | v                                       | x                        | v                         | v              | v                    | v                            | v                                        | v                 | 8     |
| Yu et al. [8]     | v                                | v                                       | x                        | x                         | v              | v                    | v                            | v                                        | v                 | 7     |
| Wang et al. [9]   | v                                | v                                       | v                        | x                         | v              | v                    | v                            | v                                        | v                 | 8     |
| Park et al. [10]  | v                                | v                                       | x                        | v                         | v              | x                    | v                            | v                                        | v                 | 7     |
| Fang et al. [11]  | v                                | v                                       | x                        | x                         | v              | v                    | v                            | v                                        | v                 | 7     |

**Table S2.** The detail for included studies.

| <i>p</i> Value    | Clinical Staging<br>with CAR | T Staging<br>with CAR | N Staging<br>with CAR | Independent<br>Risk Factor | Analysis              | Survival         | CAR Unit               | CAR<br>Mean/Median | CAR Range   | Study Period           |
|-------------------|------------------------------|-----------------------|-----------------------|----------------------------|-----------------------|------------------|------------------------|--------------------|-------------|------------------------|
| Li et al. [1]     | NA                           | NA                    | NA                    | Yes                        | Multivariate analysis | 5 years OS       | CRP: mg/L albumin: g/L | NR                 | NR          | Jan 2009 to Jan 2010   |
| He et al. [2]     | <0.001                       | <0.001                | <0.001                | Yes                        | Multivariate analysis | 5 years OS, DMFS | CRP: mg/L albumin: g/L | NR                 | NR          | Mar 2000 to Oct 2013   |
| Zhang et al. [3]  | NA                           | NA                    | NA                    | Yes                        | Multivariate analysis | 3 years OS       | CRP: mg/L albumin: g/L | 0.093/0.036        | 0.002–4.594 | Nov 2009 to Feb 2012   |
| Wang et al. [4]   | NA                           | <0.001                | =0.005                | Yes                        | Multivariate analysis | 5 years DMFS     | CRP: mg/L albumin: g/L | NR/0.032           | NR          | Dec 2009 to May 2011   |
| Tao et al. [5]    | =0.024                       | <0.001                | =0.842                | Yes                        | Multivariate analysis | 5 years OS       | CRP: mg/L albumin: g/L | NR/0.138           | 0.010–1.932 | Jan 2007 to Dec 2012   |
| Sun et al. [6]    | NA                           | NA                    | NA                    | Yes                        | Multivariate analysis | 5 years OS       | CRP: mg/L albumin: g/L | NR/0.164           | NR          | Jan 2008 to Oct 2011   |
| Kuboki et al. [7] | =0.008                       | =0.1                  | =0.1                  | Yes                        | Multivariate analysis | 5 years OS, DFS  | CRP: mg/L albumin: g/L | NR                 | NR          | Feb 2003 to April 2012 |
| Yu et al. [8]     | <0.05                        | NA                    | <0.01                 | Yes                        | Multivariate analysis | 5 years OS       | CRP: mg/L albumin: g/L | NR/0.374           | 0.006–2.020 | May 2006 to Oct 2011   |
| Wang et al. [9]   | <0.001                       | <0.001                | <0.001                | Yes                        | Multivariate analysis | 5 years OS, DFS  | CRP: mg/L albumin: g/L | NR                 | NR          | Jan 2005 to Mar 2018   |
| Park et al. [10]  | =0.002                       | =0.002                | =0.006                | Yes                        | Multivariate analysis | 5 years OS, DFS  | CRP: mg/L albumin: g/L | 0.137/NR           | 0.005–1.124 | May 2004 to Dec 2011   |
| Fang et al. [11]  | <0.001                       | <0.001                | NA                    | Yes                        | Multivariate analysis | 5 years OS, DFS  | CRP: mg/L albumin: g/L | NR/0.08            | 0.01–5.48   | Jan 2008 to Dec 2017   |

NA, not available; OS, overall survival; DFS, disease free survival; CAR, C-reactive protein to albumin ratio.

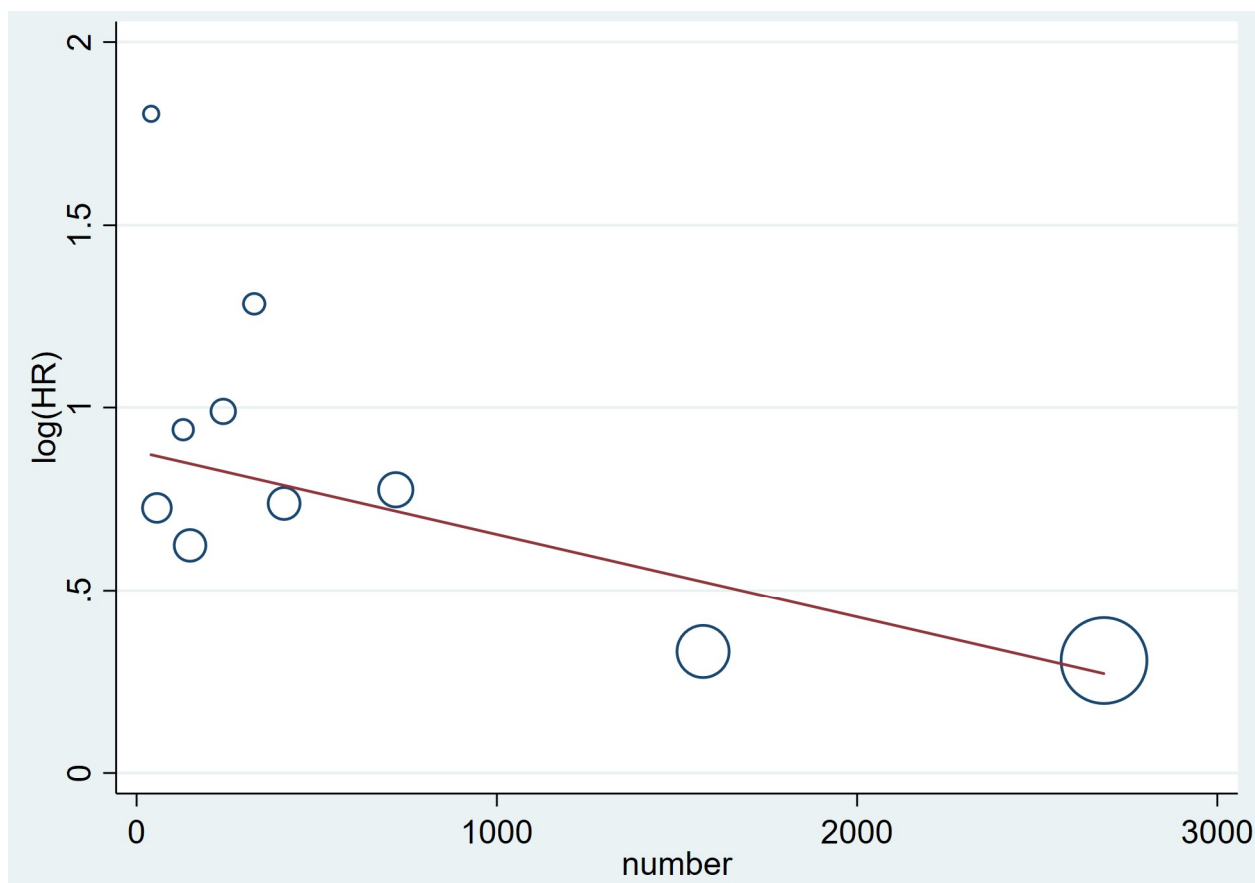

**Figure S1.** Meta-regression of sample size and overall survival. HR, hazard ratio.

| author | year | number | HR (95% CI) |                    |
|--------|------|--------|-------------|--------------------|
| Park   | 2016 | 40     |             | 6.08 (1.97, 18.74) |
| Kuboki | 2018 | 56     |             | 3.18 (1.13, 8.93)  |
| Yu     | 2017 | 129    |             | 2.73 (1.58, 4.73)  |
| Sun    | 2017 | 148    |             | 2.33 (1.58, 3.44)  |
| Wang   | 2019 | 240    |             | 2.35 (1.72, 3.20)  |
| Fang   | 2020 | 326    |             | 2.49 (1.86, 3.32)  |
| Li     | 2016 | 409    |             | 2.39 (1.86, 3.09)  |
| Tao    | 2016 | 719    |             | 2.35 (1.87, 2.94)  |
| Zhang  | 2016 | 1572   |             | 2.13 (1.68, 2.71)  |
| He     | 2016 | 2685   |             | 1.99 (1.57, 2.53)  |

**Figure S2.** Cumulative meta-analysis by sample size.

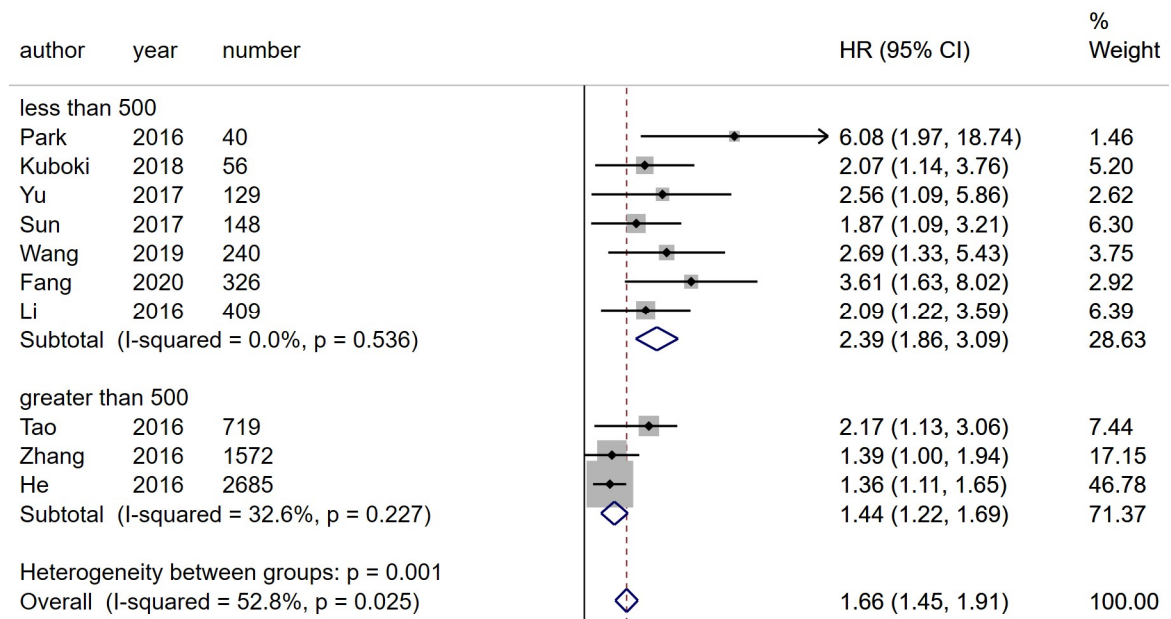

**Figure S3.** Forest plots for the subgroup analysis by sample size. OS, overall survival. CAR, C-reactive protein-to-albumin ratio. HNC, head and neck cancer.

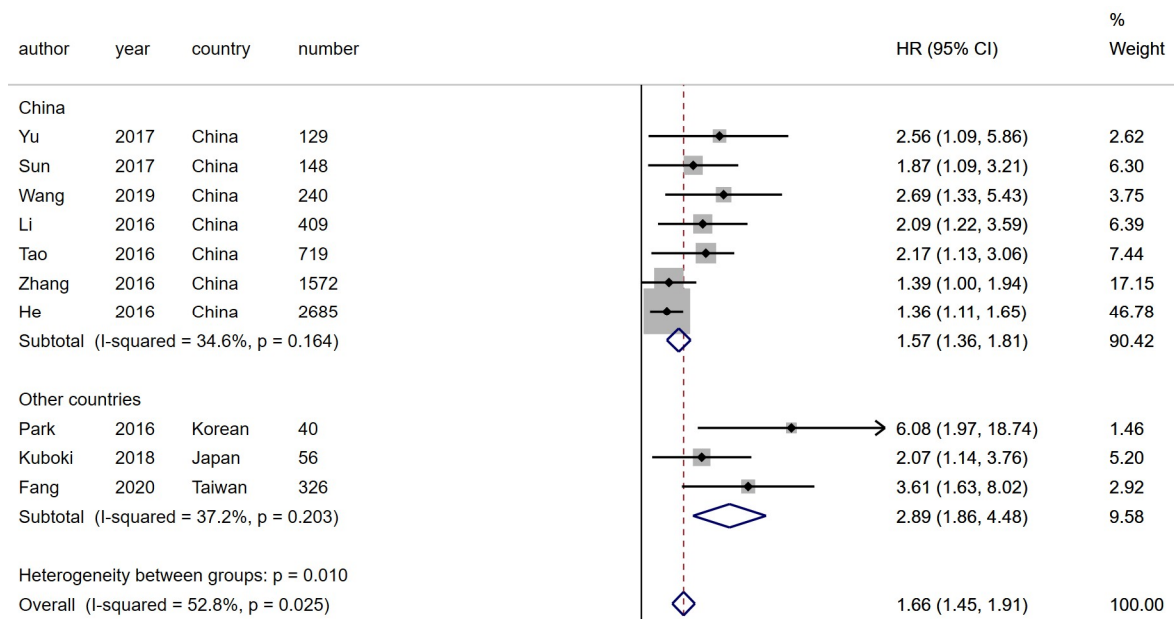

**Figure S4.** Forest plots for the subgroup analysis by country of origin.

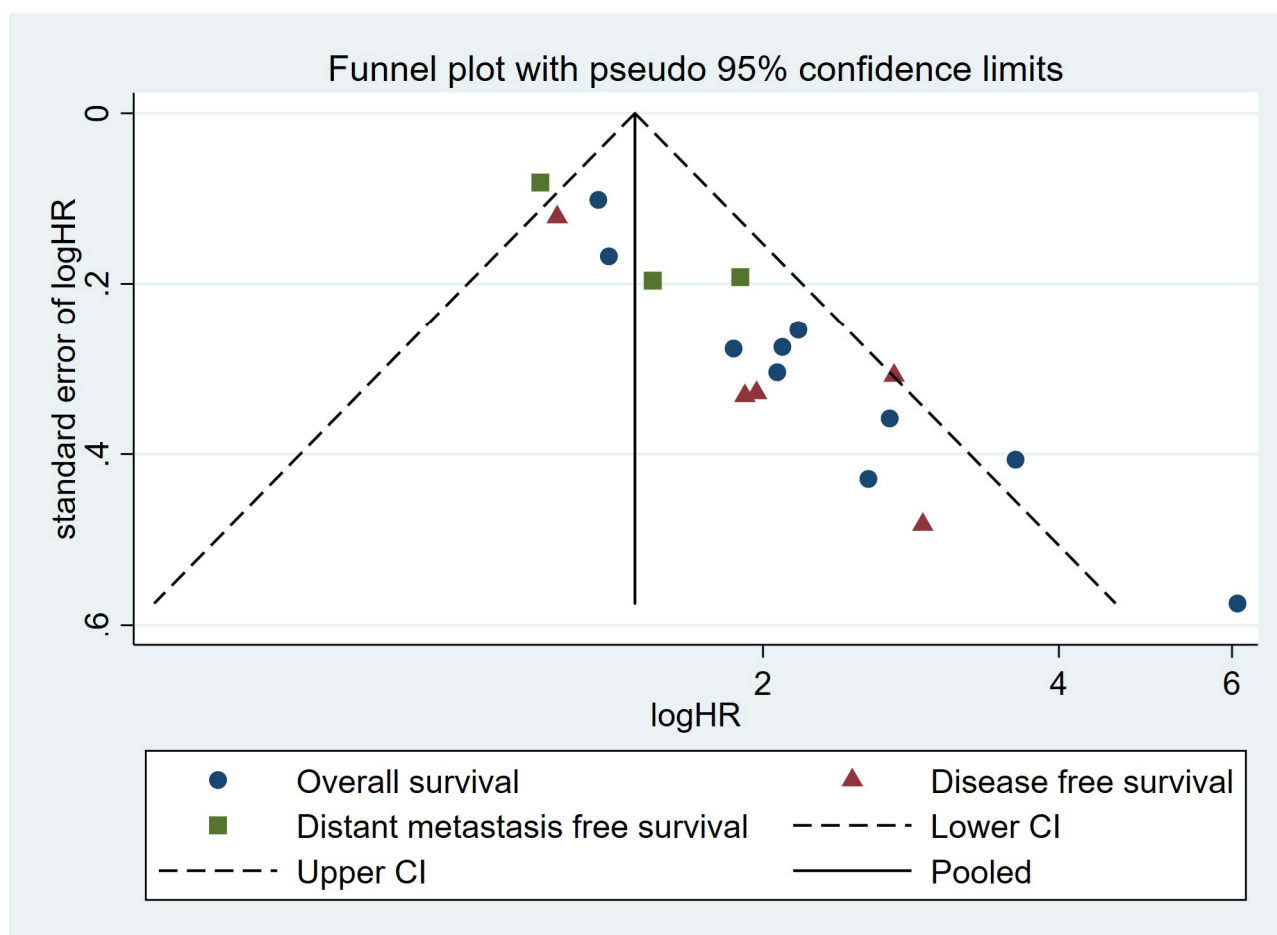

**Figure S5.** Funnel plots providing a graphic estimate of bias for all three outcomes. Each point represents a separate study. The two sloping lines represent the 95% confidence interval.

## Reference

1. Li, J.P.; Chen, S.L.; Liu, X.M.; He, X.; Xing, S.; Liu, Y.-J.; Lin, Y.-H.; Liu, W.-L. A Novel Inflammation-Based Stage (I Stage) Predicts Overall Survival of Patients with Nasopharyngeal Carcinoma. *Int. J. Mol. Sci.* **2016**, *17*, 1900.
2. He, S.; Wang, Y.; Chen, H.; Yang, L.; Liang, S.; Lu, L.; Chen, Y. C-Reactive Protein/Albumin Ratio (CAR) as a Prognostic Factor in Patients with Non-Metastatic Nasopharyngeal Carcinoma. *J. Cancer* **2016**, *7*, 2360–2366.
3. Zhang, Y.; Zhou, G.Q.; Liu, X.; Chen, L.; Li, W.-F.; Tang, L.-L.; Liu, Q.; Sun, Y.; Ma, J. Exploration and Validation of C-Reactive Protein/Albumin Ratio as a Novel Inflammation-Based Prognostic Marker in Nasopharyngeal Carcinoma. *J. Cancer* **2016**, *7*, 1406–1412.
4. Wang, Y.; Yang, L.; Xia, L.; Chen, Y. High C-reactive protein/albumin ratio predicts unfavorable distant metastasis-free survival in nasopharyngeal carcinoma: A propensity score-matched analysis. *Cancer Manag. Res.* **2018**, *10*, 371–381.
5. Tao, C.J.; Chen, Y.Y.; Jiang, F.; Feng, X.-L.; Jin, Q.-F.; Jin, T.; Piao, Y.-F.; Chen, X.-Z. The C-reactive Protein/Albumin Ratio Is an independent Prognostic Factor for Overall Survival in Patients with Nasopharyngeal Carcinoma Receiving Intensity-Modulated Radiotherapy. *J. Cancer* **2016**, *7*, 2005–2011.
6. Sun, P.; Chen, C.; Xia, Y.; Bi, X.; Liu, P.; Zhang, F.; Yang, H.; An, X.; Jiang, W.; Wang, F. The Ratio of C-Reactive Protein/Albumin is a Novel Inflammatory Predictor of Overall Survival in Cisplatin-Based Treated Patients with Metastatic Nasopharyngeal Carcinoma. *Dis. Markers* **2017**, *2017*, 6570808.
7. Kuboki, A.; Kanaya, H.; Nakayama, T.; Konno, W.; Goto, K.; Nakajima, I.; Kashiwagi, T.; Hirabayashi, H.; Haruna, S.I. Prognostic value of C-reactive protein/albumin ratio for patients with hypopharyngeal and laryngeal cancer undergoing invasive surgery involving laryngectomy. *Head Neck* **2019**, *41*, 1342–1350.
8. Yu, S.T.; Zhou, Z.; Cai, Q.; Liang, F.; Han, P.; Chen, R.; Huang, X.-M. Prognostic value of the C-reactive protein/albumin ratio in patients with laryngeal squamous cell carcinoma. *OncoTargets Ther.* **2017**, *10*, 879–884.
9. Wang, Q.; Song, X.; Zhao, Y.; He, Q.; Shi, M.; Xu, P.; Ni, S.; Chen, Y.; Lin, J.; Zhang, L. Preoperative high c-reactive protein/albumin ratio is a poor prognostic factor of oral squamous cell carcinoma. *Future Oncol.* **2019**, *15*, 2277–2286.

10. Park, H.C.; Kim, M.Y.; Kim, C.H. C-reactive protein/albumin ratio as prognostic score in oral squamous cell carcinoma. *J. Korean Assoc. Oral Maxillofac. Surg.* **2016**, *42*, 243–250.
11. Fang, K.H.; Lai, C.H.; Hsu, C.M.; Huang, E.; Tsai, M.-S.; Chang, G.-H.; Lee, Y.-C.; Tsai, Y.-T. A retrospective study on the prognostic value of preoperative C-reactive protein to albumin ratio in patients with oral cavity squamous cell carcinoma. *PeerJ* **2020**, *8*, e9361.
